# Supplementary material
Source: PubMed Central journal article supplement (PMC3921679)
Supplement: NIHMS364387-supplement-1.pdf [file NIHMS364387-supplement-1.pdf]

## Materials and Methods

### Chemicals and Drugs

The non-selective CB1R/CB2R agonists JWH-018 [(1-pentyl-1H-indol-3-yl)-1-naphthalenyl-methanone),  $\Delta^9$ -THC ( $\Delta^9$ -tetrahydrocannabinol) and WIN 55,212-2 [(R)-(+)-[2,3-dihydro-5-methyl-3-(4-morpholinylmethyl)pyrrolo[1,2,3-*de*]-1,4-benzoxazin,-6-yl]-1-naphthalenylmethanone mesylate] were purchased from Cayman Chemical (Ann Arbor, MI), Cerilliant (Round Rock, TX) and Tocris Bioscience (Ellisville, MO), respectively. JWH-018 N-(5-hydroxypentyl)  $\beta$ -D-glucuronide, a major metabolite of JWH-018, was synthesized by Cayman Chemical Company where <sup>1</sup>HNMR analysis indicates chemical shifts and coupling constants consistent with the chemical structure (Figure 1 and Figure 2). (+)-11-Nor- $\Delta^9$ -THC-9-carboxylic acid glucuronide is a major metabolites of THC and was synthesized by Cerilliant. O-2050 [(6a*R*,10a*R*)-3-(1-Methanesulfonylamino-4-hexyn-6-yl)-6a,7,10,10a-tetrahydro-6,6,9-trimethyl-6*H*-dibenzo[*b,d*]pyran)] is a neutral antagonist at CB1Rs and was purchased from Tocris Bioscience. [<sup>3</sup>H]CP-55,940 is a non-selective CB1/CB2R agonist used for competition receptor binding assays and was purchased from Perkin Elmer Life and Analytical Sciences (Wellesey, MA). [<sup>35</sup>S]GTP $\gamma$ S was used to quantify G-protein activation and was purchased from American Radiolabeled Chemicals (St. Louis, MO). Non-radiolabeled GTP $\gamma$ S was purchased from EMD Chemical (Gibbstown, NJ).

### Mice

The University of Arkansas for Medical Sciences IACUC committee approved the animal use protocol utilized in this study. B6SJL mice were maintained on a 12 hour light/dark cycle with free access to food and water. Mice were sacrificed under isoflurane anesthesia and

brains were harvested, snap frozen in liquid nitrogen and stored at  $-80^{\circ}\text{C}$  until membrane homogenates were prepared.

### **Brain Membrane Preparation**

Whole mouse brains were homogenized using a Dounce glass homogenizer in an ice-cold buffer comprised of 50 mM HEPES pH 7.4, 3 mM  $\text{MgCl}_2$ , and 1 mM EDTA. Homogenates were centrifuged at  $40,000 \times g$  for 10 minutes at  $4^{\circ}\text{C}$  and the supernant discarded. Pellets were homogenized and centrifuged similarly twice more and finally suspended in 50 mM HEPES, pH 7.4, divided into aliquots and stored at  $-80^{\circ}\text{C}$ .

### **Competition Receptor Binding Assays**

Receptor binding assays utilized 50  $\mu\text{g}$  of mouse brain membranes as the source of CB1Rs and the non-selective CB1R/CB2R radioligand [ $^3\text{H}$ ]CP-55,940, as previously described<sup>1</sup>. Briefly, each binding reaction was conducted in triplicate and was performed in a total volume of 1 ml that contained a final concentration of 0.2 nM [ $^3\text{H}$ ]CP-55,940, 50 mM Tris (pH 7.4), 0.05% bovine serum albumin, 5 mM  $\text{MgCl}_2$ , 1.0% DMSO, 0.1% EtOH and increasing concentrations (0.1 nM – 10  $\mu\text{M}$ ) of either JWH-018, THC, 018-gluc, or THC-gluc. Non-specific binding was defined as the amount of [ $^3\text{H}$ ]CP-55,940 binding remaining in the presence of a 10  $\mu\text{M}$  concentration of the high affinity, non-radioactive CB1R/CB2R agonist WIN-55,212-2. After the addition of all reagents, all samples were mixed by vortexing and incubated at room temperature for 1.5 h to allow the reaction to reach equilibrium binding. Binding reactions were terminated by rapid vacuum filtration through glass fiber filters with three washes of ice-cold 50 mM Tris pH 7.4 containing 0.05% bovine serum albumin. The amount of radioactivity for each sample

was quantified by scintillation counting the following morning by adding 4 ml of Scintiverse scintillation fluid (Fisher Scientific, Waltham, MA) to each filter paper.

### **GTP $\gamma$ S Binding Assays**

G-protein activity was quantified by employing 25  $\mu$ g of mouse brain membranes and [ $^{35}$ S]GTP $\gamma$ S in a total reaction volume of 1 ml, as previously described<sup>2</sup>. Specifically, the ability of all cannabinoid compounds to modulate G-protein activity was examined in triplicate samples in a buffer containing a final concentration of 0.1 nM [ $^{35}$ S]GTP $\gamma$ S, 20 mM HEPES (pH 7.4), 100 mM NaCl, 10 mM MgCl<sub>2</sub>, 10  $\mu$ M GDP, 0.05% bovine serum albumin, 20 units/L adenosine diaminase, 0.1% EtOH and 1.0% DMSO. Nonspecific binding was defined by the amount of [ $^{35}$ S]GTP $\gamma$ S binding remaining in the presence of a 10  $\mu$ M concentration of non-radiolabeled GTP $\gamma$ S. Reaction mixtures were thoroughly mixed by vortexing and incubated at 30°C for 30 minutes. Rapid vacuum filtration through glass fiber filters terminated reactions and all samples were subsequently washed three times with ice-cold 50 mM HEPES (pH 7.4) containing 0.05% bovine serum albumin. The amount of radioactivity for each sample was quantified by scintillation counting the following morning after adding 4 ml of Scintiverse scintillation fluid to the filter papers.

### **Statistical Analysis**

GraphPad Prism<sup>®</sup> v4.0b (GraphPad Software, Inc., San Diego, CA) was used for all curve-fitting and statistical analyses. Data from three or more experimental groups were analyzed by one-way ANOVA followed by a Newman-Keuls Multiple Comparison *post-hoc*

comparison. The non-paired Student's *t*-test was used to compare data from two experimental groups. Statistical significant differences were defined as  $P < 0.05$ .

## Supplemental References

- (1) Prather, P. L., Song, L., Piros, E. T., Law, P. Y. and Hales, T. G. (2000) delta-Opioid receptors are more efficiently coupled to adenylyl cyclase than to L-type Ca(2+) channels in transfected rat pituitary cells. *J Pharmacol Exp Ther* 295, 552-562.
- (2) Prather, P. L., Martin, N. A., Breivogel, C. S. and Childers, S. R. (2000) Activation of cannabinoid receptors in rat brain by WIN 55212-2 produces coupling to multiple G protein alpha-subunits with different potencies. *Mol Pharmacol* 57, 1000-1010.

## Figure Legends

Figure 1:  $^1\text{H}$ NMR confirmation data for JWH-018 N-(5-hydroxypentyl)  $\beta$ -D-glucuronide.

Figure 2:  $^1\text{H}$ NMR confirmation data for JWH-018 N-(5-hydroxypentyl)  $\beta$ -D-glucuronide.

JWH-018-N-(5-hydroxypentyl)-β-D-glucuronide

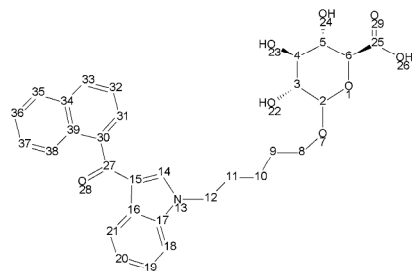

<sup>1</sup>H NMR (400 MHz, DMSO-d<sub>6</sub>) δ 8.25-8.33 (m, 1H), 7.94-8.10 (m, 3H), 7.75 (s, 1H), 7.47-7.69 (m, 5H), 7.30 (dquin, *J*=1.37, 7.28 Hz, 2H), 5.01 (br. s., 2H), 4.10-4.24 (m, 3H), 3.48-3.74 (m, 3H), 3.34-3.47 (m, 3H), 3.05-3.21 (m, 2H), 2.95 (d, *J*=6.64 Hz, 1H), 1.60-1.76 (m, 2H), 1.48 (td, *J*=6.93, 14.26 Hz, 2H), 1.17-1.33 (m, 2H)

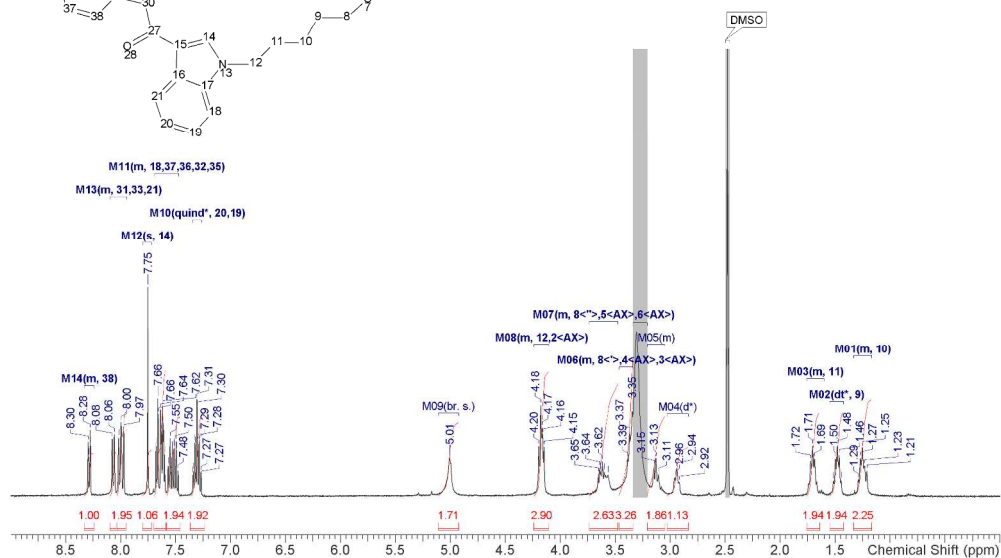

794x592mm (96 x 96 DPI)

JV-8-211\_20120123\_001

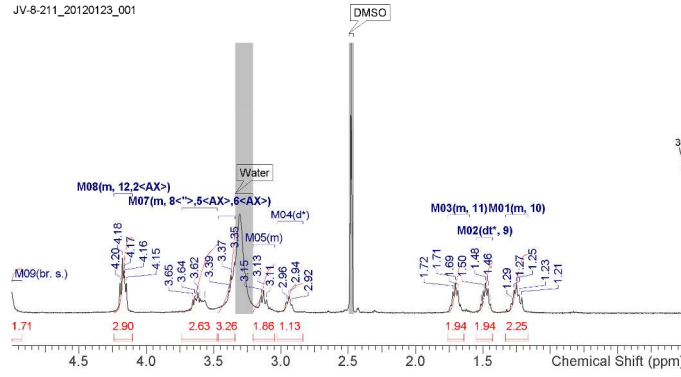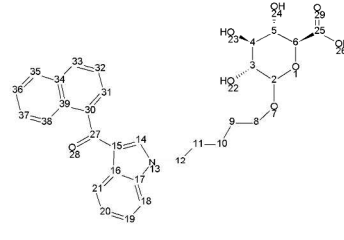

JV-8-211\_20120123\_001

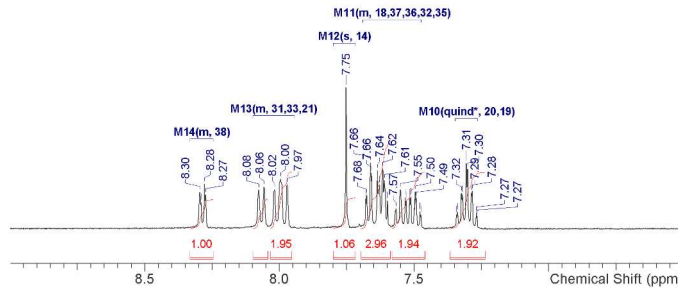

| No. | Atom  | Exp. Shift (ppm) | Multiplet |
|-----|-------|------------------|-----------|
| 1   | 10    | 1.25             | M01       |
| 2   | 9     | 1.48             | M02       |
| 3   | 11    | 1.70             | M03       |
| 4   | 8<>   | 3.37             | M08       |
| 5   | 4<AX> | 3.37             | M08       |
| 6   | 3<AX> | 3.37             | M08       |
| 7   | 8<*>  | 3.62             | M07       |
| 8   | 5<AX> | 3.62             | M07       |
| 9   | 6<AX> | 3.62             | M07       |
| 10  | 12    | 4.17             | M08       |
| 11  | 2<AX> | 4.17             | M08       |
| 12  | 20    | 7.30             | M10       |
| 13  | 19    | 7.30             | M10       |
| 14  | 18    | 7.57             | M11       |
| 15  | 37    | 7.57             | M11       |
| 16  | 36    | 7.57             | M11       |
| 17  | 32    | 7.57             | M11       |
| 18  | 35    | 7.57             | M11       |
| 19  | 14    | 7.75             | M12       |
| 20  | 31    | 8.02             | M13       |
| 21  | 33    | 8.02             | M13       |
| 22  | 21    | 8.02             | M13       |
| 23  | 38    | 8.28             | M14       |

252x188mm (300 x 300 DPI)
